# Supplementary material for: Self-assembled peptide-based nanoblocks for drug delivery
Source: Royal Society of Chemistry journal article supplement (doi:10.1039/d3nj03414c), 2023-01-01
Supplement: d3nj03414c1.pdf [file d3nj03414c1.pdf]

## Supporting Information

Xiaoming Xie<sup>a,c\*</sup>, Fanrui Meng<sup>a</sup>, Zilin Zhang<sup>a</sup>, Xingyu Xu<sup>a</sup>, Minmin Guo<sup>a</sup>, Yulian Jiang<sup>a</sup>,  
Ting Wang<sup>b\*</sup>

a. Department of Chemistry, Xinzhou Normal University, Xinzhou, Shanxi 034000, China.

b. College of Physical Science and Technology, Dalian University, Dalian, 116622, China

c. School of Chemistry, South China Normal University, Guangzhou 510006, China.

Corresponding Author. E-mail: [xiexm0910@163.com](mailto:xiexm0910@163.com); [wangting@dlu.edu.cn](mailto:wangting@dlu.edu.cn)

### Characterization

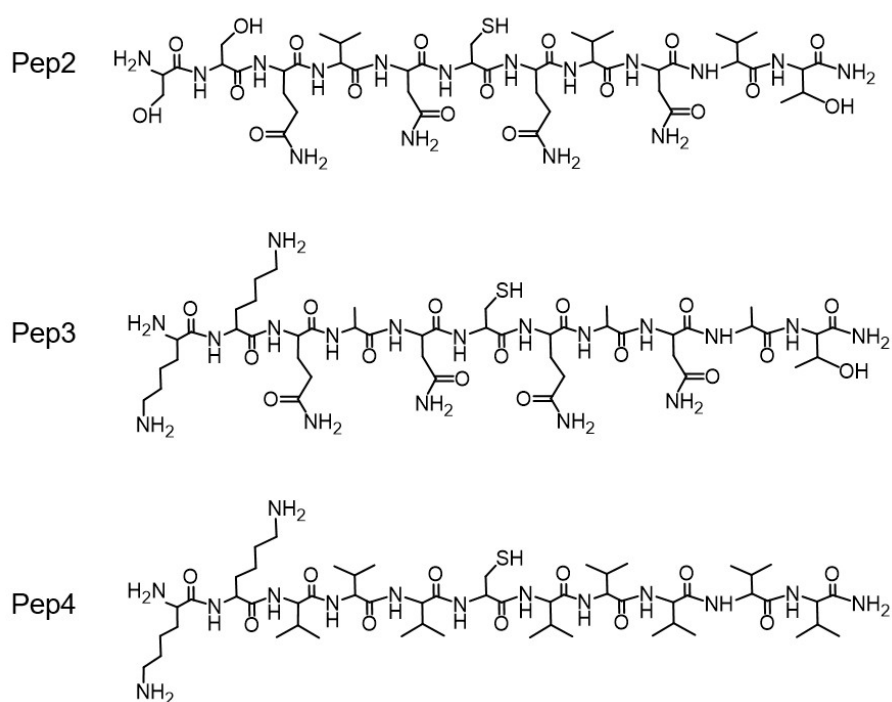

**Fig. S1** Molecular structures of the synthesized peptides (Pep2-Pep4).

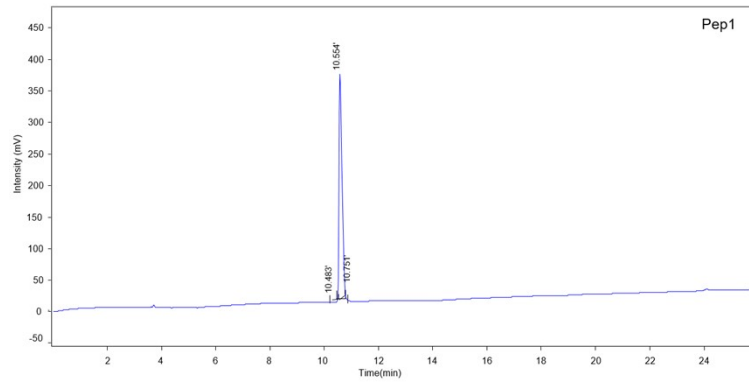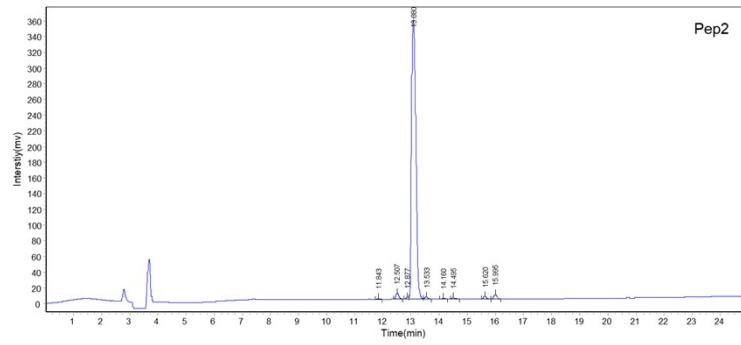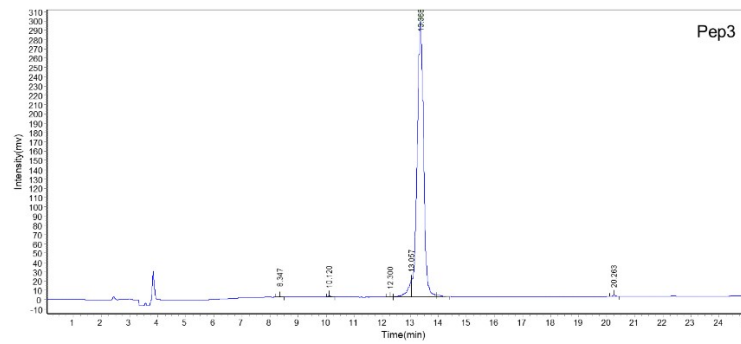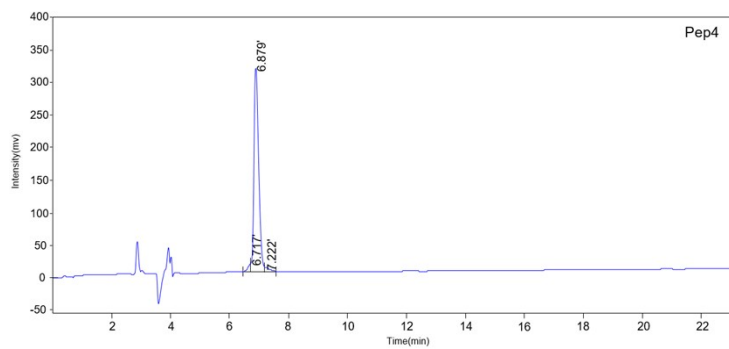

**Fig. S2** HPLC profiles of the synthesized peptides from Pep1 to Pep4

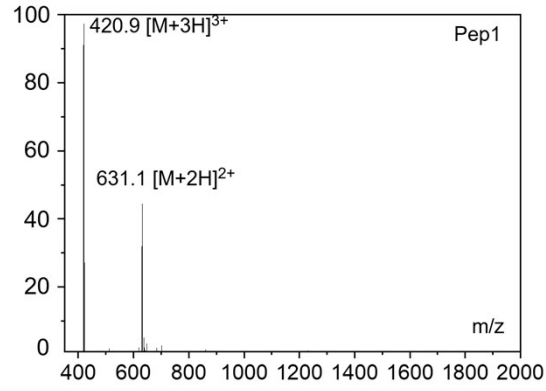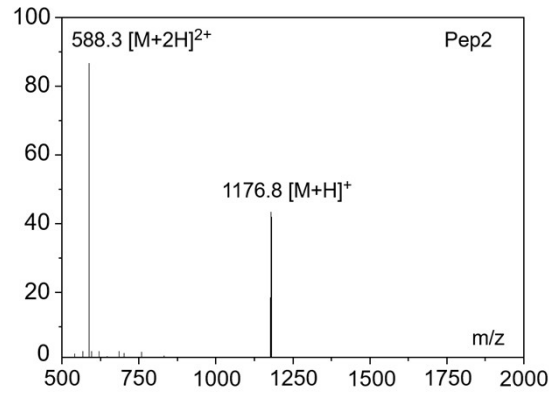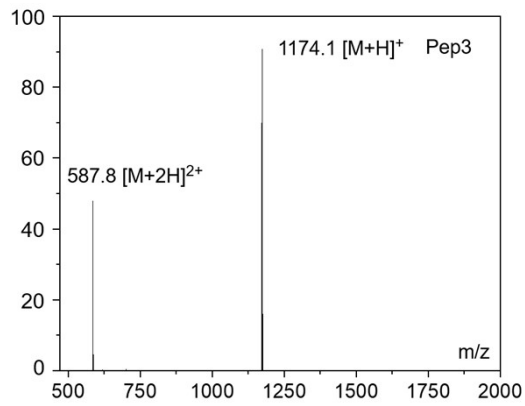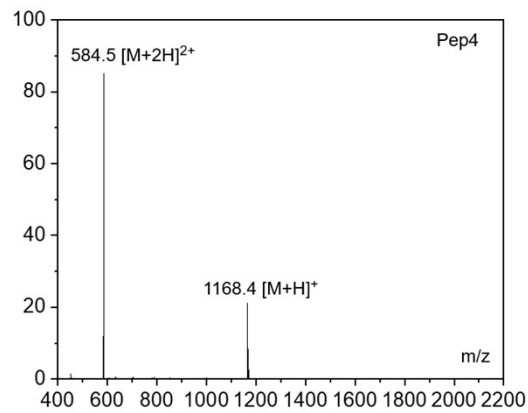

**Fig. S3** ESI-MS data of the short peptides from Pep1 to Pep4

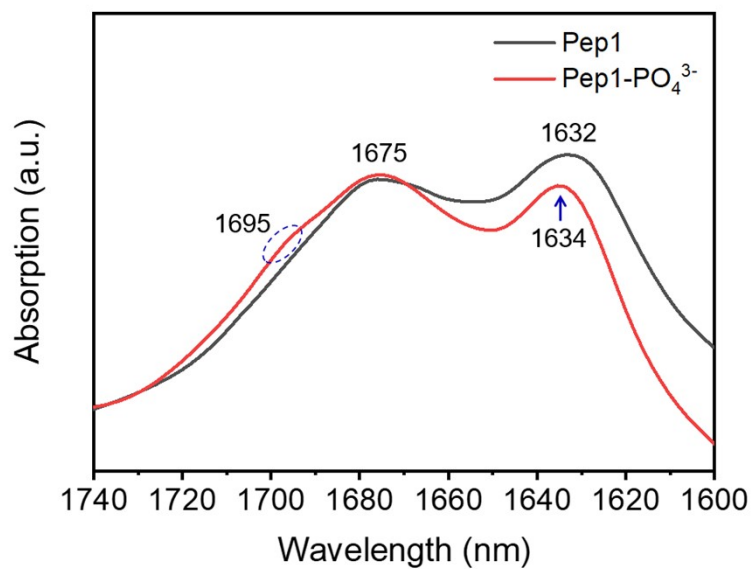

**Figs S4.** FTIR spectra of the lyophilized peptide samples of Pep1 and Pep1-PO<sub>4</sub><sup>3-</sup> complex.

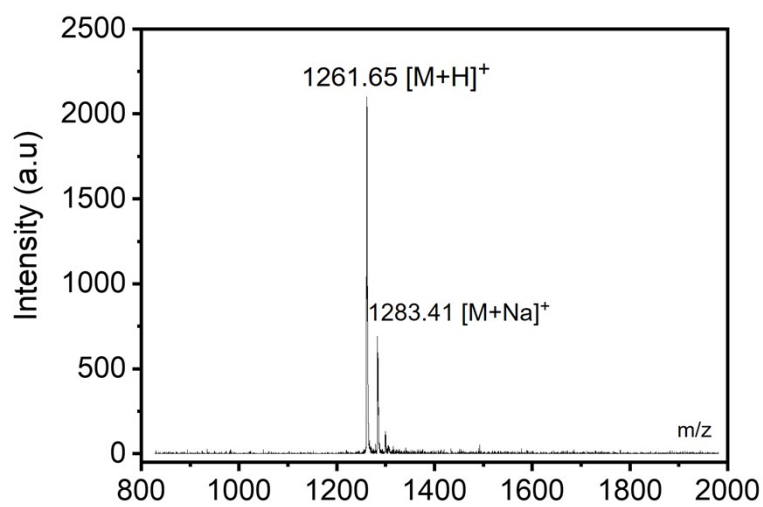

**Fig. S5** MALDI-TOF-MS data of the Pep1 obtained from the aqueous solution of Pep1-PO<sub>4</sub><sup>3-</sup>

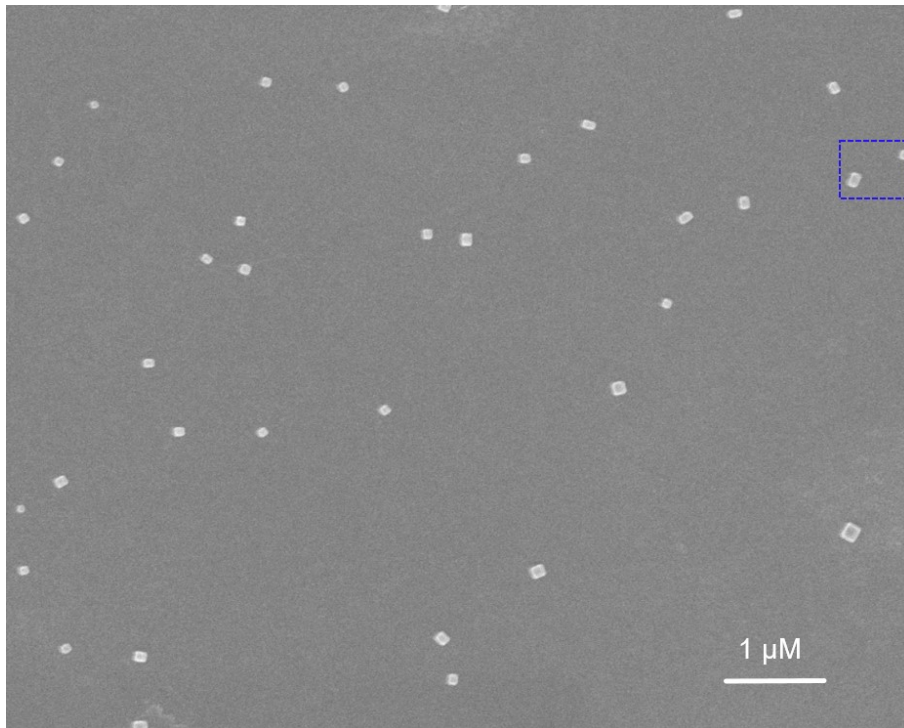

**Fig. S6** SEM image of Pep1-PO<sub>4</sub><sup>3-</sup> nanoblocks (the enlarged images in blue area presented in Fig 3d in main text)

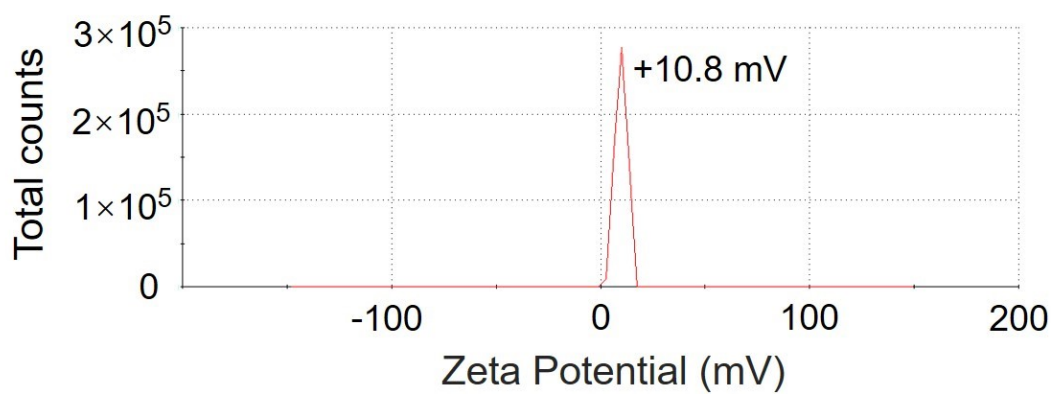

**Fig. S7** Zeta potential of Pep1 alone in aqueous solution.

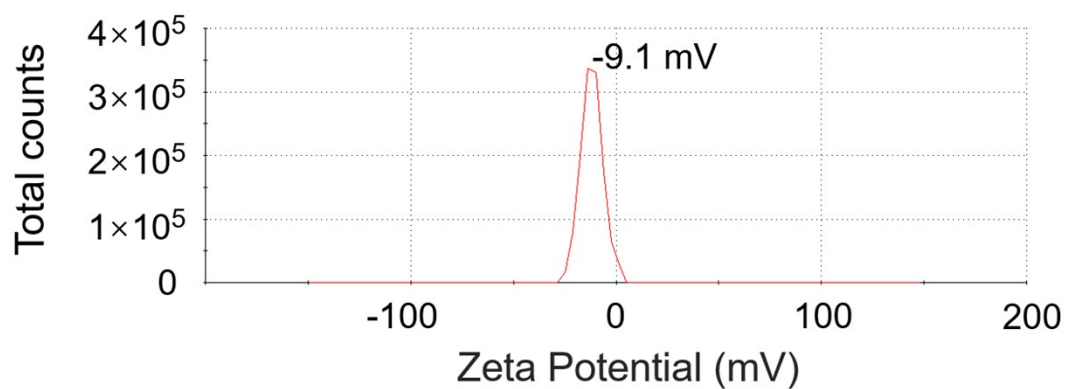

**Fig. S8** Zeta potential of Pep1- $\text{PO}_4^{3-}$  assembly in aqueous solution.

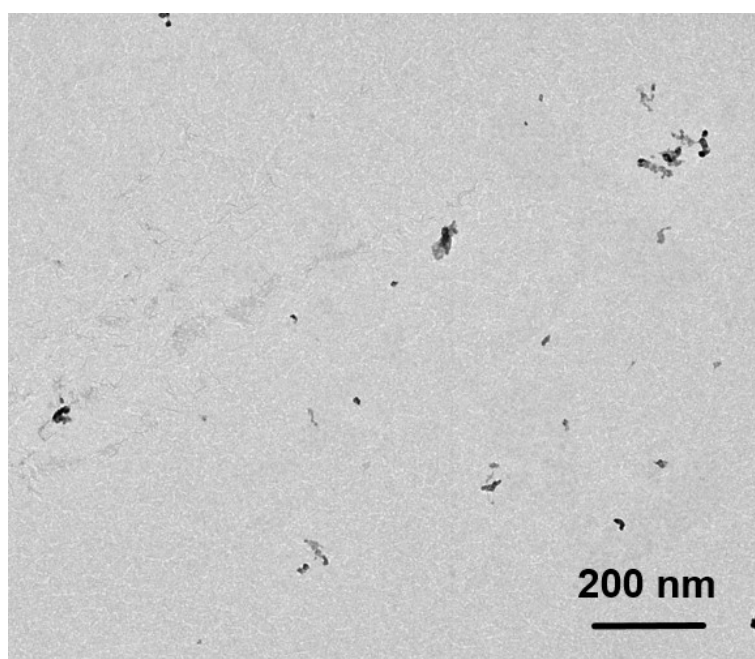

**Fig. S9** TEM image prepared from the aqueous samples of Pep2-PO<sub>4</sub><sup>3-</sup> complexes. (The Pep2 without lysine residues mixed with PO<sub>4</sub><sup>3-</sup> was not form the uniform nanostructures)

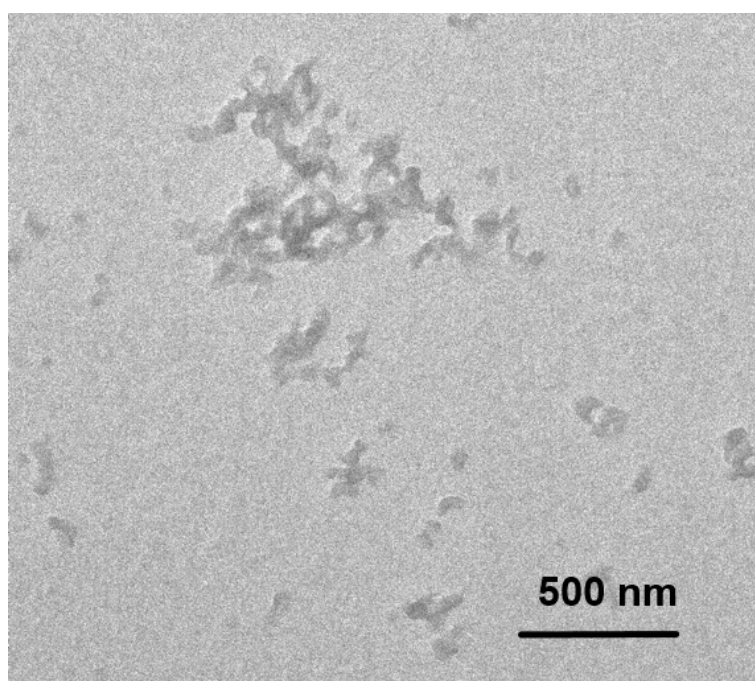

**Fig. S10** TEM image prepared from the aqueous sample of Pep3-PO<sub>4</sub><sup>3-</sup> complexes.

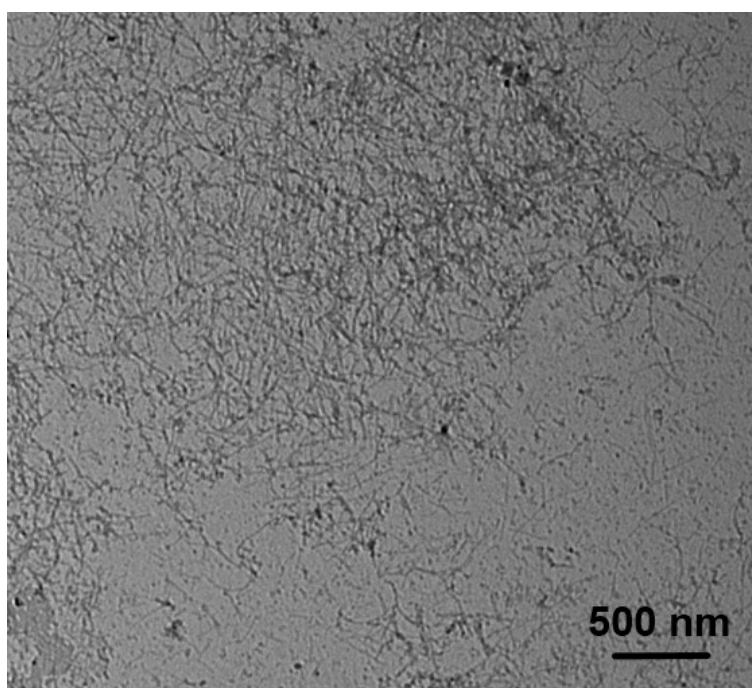

**Fig. S11** TEM image prepared from the aqueous sample of Pep4-PO<sub>4</sub><sup>3-</sup> complexes.

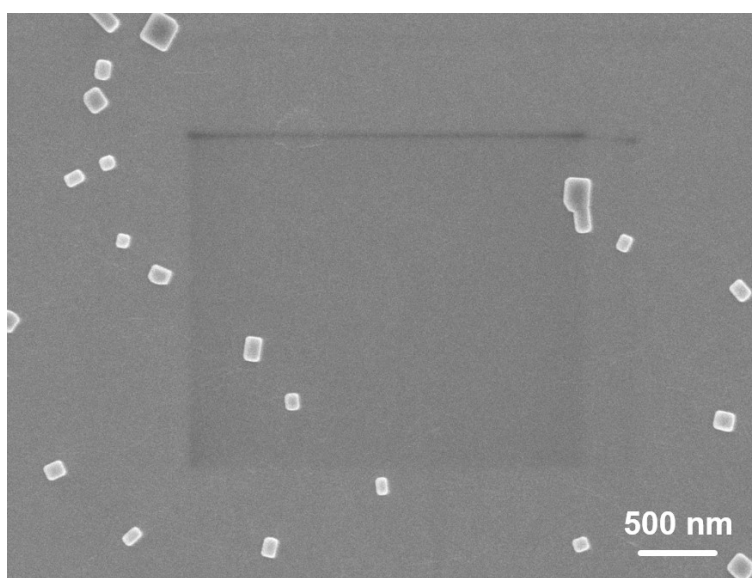

**Fig. S12.** SEM image of Pep1-PO<sub>4</sub><sup>3-</sup> nanoblocks after loading curcumin.



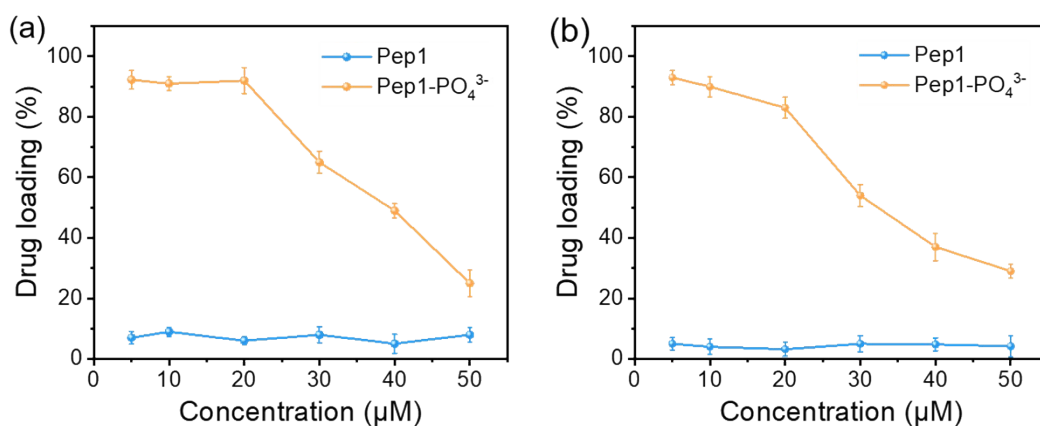

**Fig. 13** (a) Drug loading profiles of Pep1 and Pep1- $\text{PO}_4^{3-}$  nanoblocks loading different concentration of curcumin. (b) Drug loading profiles of Pep1 and Pep1- $\text{PO}_4^{3-}$  nanoblocks loading different concentration of PI. (Measured on a UV-vis spectrophotometer at 425 nm for curcumin drug, and at 537 nm for PI drug)

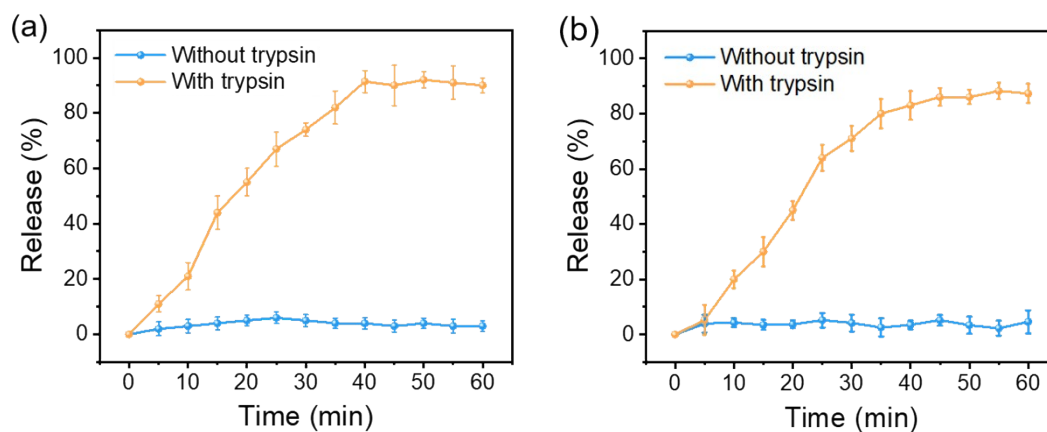

**Fig.14** (a) Drug release profiles of Pep1- $\text{PO}_4^{3-}$  nanoblocks loading curcumin in the presence or absence of trypsin. (b) Drug release profiles of Pep1- $\text{PO}_4^{3-}$  nanoblocks loading PI in the presence or absence of trypsin. (Measured on a UV-vis spectrophotometer at 425 nm for curcumin drug, and at 537 nm for PI drug, the concentration of trypsin is  $2\mu\text{g ml}^{-1}$ )<sup>1,2</sup>

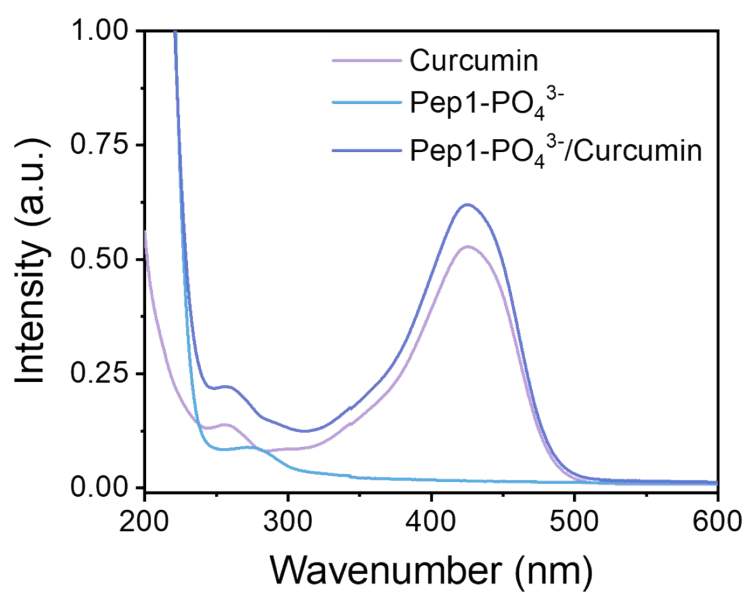

**Fig. S15.** UV-vis spectrophotometer of individual curcumin, Pep1 and Pep1-PO<sub>4</sub><sup>3-</sup> loading curcumin. (The concentration of curcumin was kept at 20 μM)

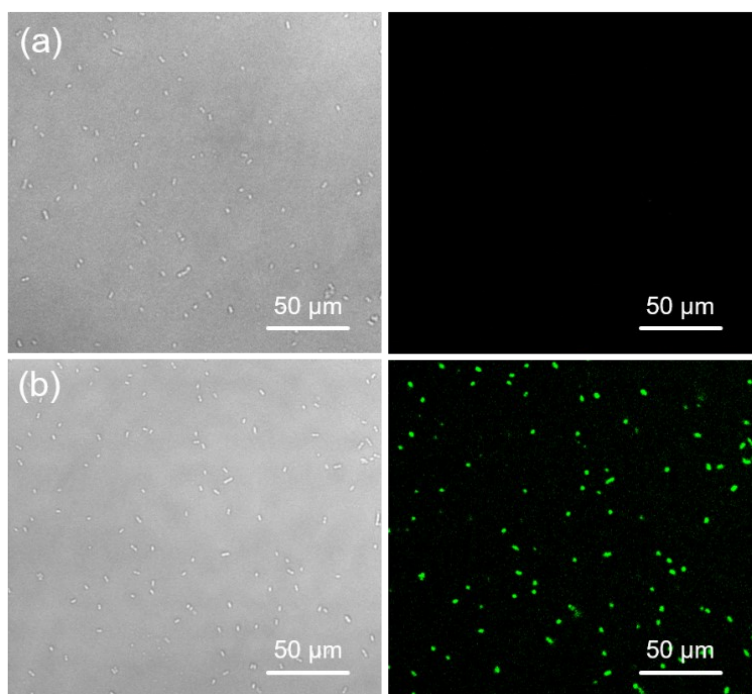

**Fig. S16.** (a) Pep1 and (b) Pep1-PO<sub>4</sub><sup>3-</sup> nanoblocks served as a vehicle for delivering curcumin into *E. coli* cells.

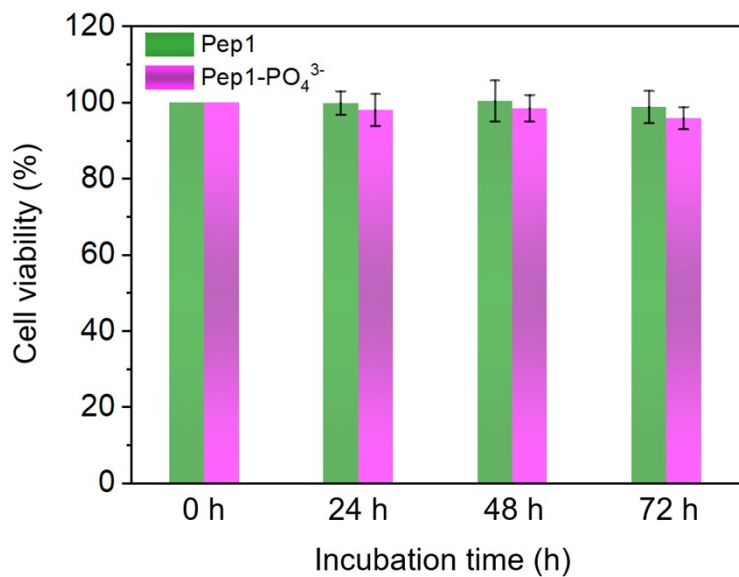

**Fig. S17.** L-929 cell (mouse fibroblasts) viability after treatment with Pep1 and Pep1-PO<sub>4</sub><sup>3-</sup>. Cells were treated with each compound for 72 h, and the viability was evaluated by MTT assay. Data are expressed as a percentage of live cells.

## Reference

1. M. Retout, Z. Jin, J. Tsujimoto, Y. Mantri, R. Borum, M. N. Creyer, W. Yim, T. He, Y. Chang, and J. V. Jokerst, *ACS Appl. Mater. Interfaces* **2022**, *14*, 52553–52565.
2. A. S. Law, M. C. Yeung and V. W. Yam, *ACS Appl. Mater. Interfaces*, **2017**, *9*, 41143-41150.
